# Supplementary material for: A Novel Strategy to Fit and Validate Physiological Models: A Case Study of a Cardiorespiratory Model for Simulation of Incremental Aerobic Exercise
Source: MDPI journal article supplement (doi:10.3390/diagnostics13050908), 2023-02-27
Supplement: s1 [file s1]

## **TITLE**

Supplementary Material for “A novel strategy to fit and validate physiological models: A case study of a cardiorespiratory model for simulation of incremental aerobic exercise”.

## **AUTHORS**

### ***Names***

Carlos A. Sarmiento\*, Leidy Y. Serna, Alher M. Hernández, Miguel Á. Mañanas

### ***Correspondence Information***

- Corresponding author: Carlos Andrés Sarmiento
- Address: Bioinstrumentation and Clinical Engineering Research Group, Bioengineering Department, Engineering Faculty,
- Universidad de Antioquia UdeA, Calle 70 # 52-51, Medellin 050016, Colombia.
- E-mail address: carlos.sarmiento@dea.edu.co

## CARDIORESPIRATORY MODEL

All the involved subsystems and their principal components, outputs, and model interactions are presented in the schematic diagram shown in Figure S1. The used symbols are described in Table S1. A brief description of the model is presented below. Its development, nominal parameters values, and complete description of mechanisms are not reported hereon for brevity. The interested reader can refer to the previous paper for full details [1].

The italic style was implemented for the symbols related to the model parameters in order to differentiate them from model variables. Parameters are model constants (i.e., they do not change as a result of the model simulations), whereas variables are time-dependent signals.

**Table S1.** Symbols' description of the Model schematic block diagram

| Symbol                          | Description                                                     |
|---------------------------------|-----------------------------------------------------------------|
| <i>AT</i>                       | Anaerobic threshold                                             |
| BF                              | Breathing frequency                                             |
| <i>CvCO<sub>2</sub></i>         | Carbon dioxide concentration in the venous blood                |
| <i>CvO<sub>2</sub></i>          | Oxygen concentration in the venous blood                        |
| <i>E<sub>max,jv</sub></i>       | Regulated end-systolic elastance of each ventricle              |
| <i>FiCO<sub>2</sub></i>         | Inspired fractions of dry carbon dioxide                        |
| <i>FiO<sub>2</sub></i>          | Inspired fractions of dry oxygen                                |
| HR                              | Heart rate                                                      |
| I                               | The action of central command                                   |
| MRV                             | Metabolically related neural drive component to the ventilation |
| Nd                              | Neural drive signal                                             |
| <i>Pao</i>                      | The pressure at the airway opening                              |
| <i>P<sub>atm</sub></i>          | Atmospheric pressure                                            |
| <i>PbCO<sub>2</sub></i>         | Brain carbon dioxide partial pressure                           |
| <i>P<sub>sa</sub></i>           | Systemic arterial pressure signal                               |
| <i>Q<sub>jp</sub></i>           | Blood flow of each peripheral compartment                       |
| <i>Q<sub>pp</sub></i>           | Blood flow from the pulmonary peripheral compartment            |
| <i>R<sub>jp</sub></i>           | Regulated resistance of each peripheral compartment             |
| <i>T<sub>c</sub></i>            | Overall duration of the muscular contraction                    |
| <i>T<sub>im</sub></i>           | Time duration of the muscular contraction-relaxation cycle      |
| <i><math>\dot{V}</math></i>     | Airflow                                                         |
| <i><math>\dot{V}_E</math></i>   | Total minute ventilation                                        |
| <i><math>\dot{V}CO_2</math></i> | Carbon dioxide output                                           |
| <i><math>\dot{V}O_2</math></i>  | Oxygen uptake                                                   |
| <i>V<sub>u,jv</sub></i>         | Regulated unstressed volume of each venous compartment          |
| VT                              | Tidal volume                                                    |
| TI                              | Inspiratory time                                                |

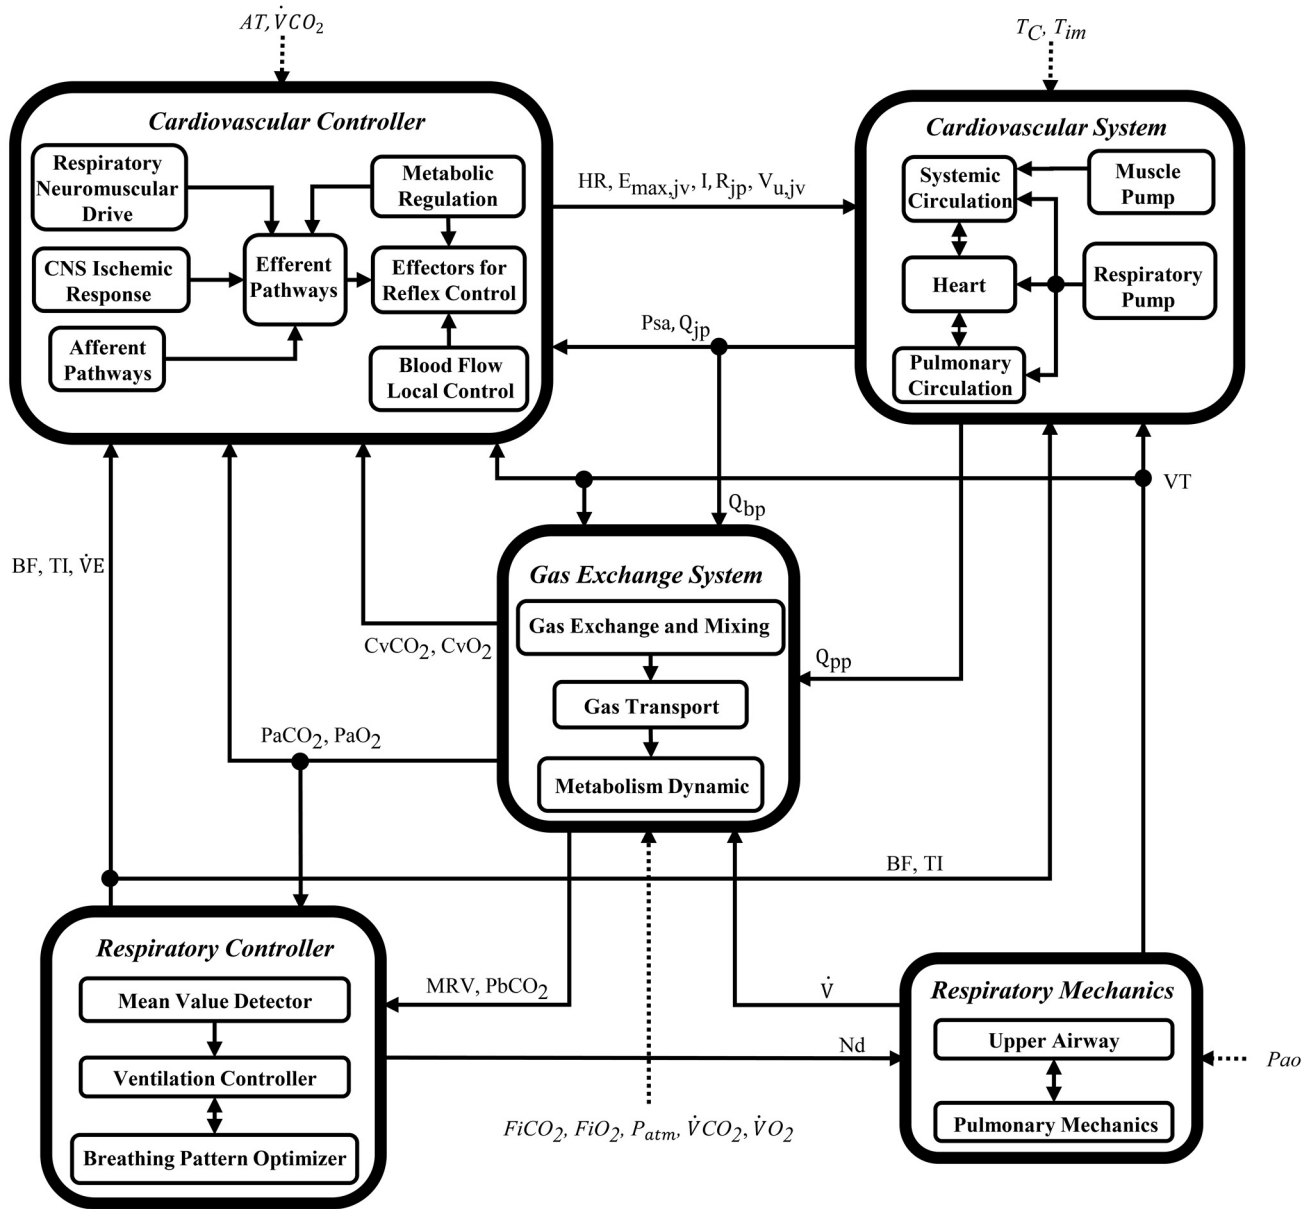

**Figure S1.** Schematic diagram of the model under study. The dashed lines denote model inputs. See Table S1 for symbols description

## EXPERIMENTAL DATA

The experimental data used correspond to those recorded to build and evaluate the cardiorespiratory model [1].

All the procedures were approved by the Human Research Ethical Committee of the Department of University Research (SIU) of the University of Antioquia (approval certificate 17-59-711) and are conformed to the Declaration of Helsinki. All volunteers' written consents were obtained after giving them the complete information of the experimental protocol and the possible risks.

Thirty Hispanic adult male volunteers performed the experimental test ( $28.3 \pm 6.9$  years old,  $173.6 \pm 6.0$  cm height,  $76.5 \pm 9.3$  kg weight). They were considered healthy, not overweight, with physical fitness that included sedentary subjects and subjects accustomed to physical training, non-smokers, no history, or symptoms of cardiovascular, pulmonary, metabolic, or neurological diseases, and without pacemakers or other implanted electrical stimulators.

The volunteers performed an incremental, submaximal, and multistate cardiopulmonary exercise test in a programmable cycle ergometer under controlled environment conditions ( $26.6 \pm 1.7^\circ C$ ,  $64.0 \pm 5.1\%$  relative humidity, and 640 mmHg). The test lasted 45 minutes, divided into five stages: rest (2 minutes), warm-up (4 minutes), exercise (25 minutes), recovery (9 minutes), and final rest (5 minutes). Five incremental steps of 25W of load were evaluated during the exercise stage, with a duration of 5 minutes each and at a constant pedaling speed of 60 RPM.

The records comprise signals of  $\dot{V}O_2$ ,  $\dot{V}CO_2$ ,  $\dot{V}E$ ,  $TI$ ,  $VT$ ,  $BF$ ,  $PAO_2$  and  $PACO_2$ ; systolic (PS), diastolic (PD) and mean (PM) arterial blood pressures; and environment and subjects' features such as  $P_{atm}$ ,  $FiCO_2$ ,  $FiO_2$ ,  $AT$  and  $VTn$ .

## MODEL EQUATIONS AND PARAMETERS

A quantitative description of the model equations mainly related to the fitting process is presented in the following section. Full details of each of the systems and controllers' equations, and the nominal values of the parameters can be consulted in the previous work [1].

### Cardiovascular System

The main elements of the equations presented include pressures (P), inertances (L), blood flows (Q), hydraulic resistances (R) and blood volumes (V). Different subscripts are used to indicate a specific compartment: sa, systemic arteries; lv, left ventricle; s, splanchnic vascular beds; am, active skeletal muscle vascular beds. The systemic circulation describes peripheral and venous circulation (subscripts p and v) in each compartment.  $P_{abd}$ ,  $P_{im}$  and  $P_{thor}$  are the abdominal pressure, the extravascular pressure of the active muscle veins (i.e., the intramuscular pressure) and the intrathoracic pressure, respectively. The subscripts max, min, T, and u are used to indicate maximum, minimum, total and unstressed values, respectively.

#### Systemic Arteries

$$L_{sa} \cdot \frac{dQ_{sa}}{dt} = (P_{sa} - P_{thor}) - R_{sa} \cdot Q_{sa} - P_{sp} \quad (S1)$$

#### Systemic Peripheral and Venous Circulation

$$R_{amv} = k_{r,am}/V_{Tamv} \quad I > 0 \quad (S2)$$

$$P_{amv} = P_0 \cdot \left[ 1 - \left( \frac{V_{Tamv}}{V_{u,amv}} \right)^{-3/2} \right] + P_{im} \quad V_{Tamv} < V_{u,amv} \quad (S3)$$

Where  $P_0$  is a constant parameter.

#### The Heart

$$R_{lv} = KR_{lv} \cdot P_{max,lv} \quad (S4)$$

$$P_{max,lv}(t) = \varphi(t) \cdot E_{max,lv} \cdot (V_{lv} - V_{u,lv}) + [1 - \varphi(t)] \cdot P_{0,lv} \cdot (\exp^{(K_{E,lv} \cdot V_{lv})} - 1) \quad 0 \leq \varphi(t) \leq 1 \quad (S5)$$

Where  $\varphi(t)$  is the ventricle activation function, with  $\varphi(t) = 1$  at maximum contraction and  $\varphi(t) = 0$  at complete relaxation;  $E_{max,lv}$  is the left ventricular elastance at the instant of maximum contraction;  $P_{0,lv}$  is a parameter that describe the end-diastolic pressure-volume relationship in the left ventricle.

#### Respiratory Pump

$$P_{jmax} = P_{jmax,n} + g_j \cdot \Delta VT \quad (S6)$$

$$P_{jmin} = P_{jmin,n} - g_j \cdot \Delta VT \quad (S7)$$

Where the subscript j indicates the compartment abdominal (abd) and thoracic (thor); the subscript n denotes nominal values.

#### Muscle Pump

$$P_{im} = A_{im} \cdot \psi(t) \quad (S8)$$

Where  $\psi(t)$  is the activation function of skeletal muscle fibers (with  $\psi(t) = 1$  at maximum contraction,  $\psi(t) = 0$  at complete relaxation).

### Cardiovascular Controller

#### Blood Flow Local Control

$$R_{amp} = \frac{R_{amp,n}}{(1 + x_{am,O_2} + x_{met})} \quad (S9)$$

$$\tau_{O_2} \cdot \frac{dx_{am,O_2}}{dt} = -x_{am,O_2} - g_{am,O_2} \cdot (C_{vam,O_2} - C_{vam,O_2n}) \quad (S10)$$

$$C_{vam,O_2} = C_{aO_2} - \frac{M_{O_2,amp}}{Q_{amp}} \quad (S11)$$

$$M_{O_2,amp} = M_{O_2,ampn} \cdot (1 + x_M) \quad (S12)$$

$$\tau_M \cdot \frac{dx_M}{dt} = -x_M + g_M \cdot I \quad (S13)$$

$$\tau_{met} \cdot \frac{dx_{met}}{dt} = -x_{met} + \Phi_{met}(t - D_{met}) \quad (S14)$$

$$\Phi_{met}(t) = \frac{\Phi_{min} + \Phi_{max} \cdot \exp\left(\frac{1-I_{0,met}}{k_{met}}\right)}{1 + \exp\left(\frac{1-I_{0,met}}{k_{met}}\right)} \quad (S15)$$

Where  $x_{am,O_2}$  and  $x_{met}$  are state variables, representing the effect of tissue hypoxia and of the other vasodilatory substances;  $\tau_{O_2}$ ,  $\tau_{met}$  and  $\tau_M$  are time constants;  $g_{am,O_2}$  is a constant gain factor;  $C_{vam,O_2}$  and  $C_{vam,O_2n}$  represents oxygen venous concentration in the active muscle and its nominal value, respectively;  $C_{aO_2}$  denotes the oxygen arterial concentration;  $M_{O_2,amp}$  and  $M_{O_2,ampn}$  are the oxygen consumption rate in the active muscle compartment and their nominal value, respectively;  $x_M$  is a state variable;  $\Phi_{met}(t)$  is the output of the sigmoidal function;  $D_{met}$  is a constant delay;  $\Phi_{min}$  is the lower saturation of the static sigmoidal characteristic;  $I_{0,met}$  is the value of  $I$  at the central point of the sigmoid;  $k_{met}$  is a parameter related to the slope of the sigmoid.

### **Efferent Pathways**

$$f_{sj} = \begin{cases} f_{es,\infty} + (f_{es,0} - f_{es,\infty}) \cdot \exp(k_{es} \cdot f_{asj}) + \gamma_{sj}(I) & f_{sj} < f_{es,max} \\ f_{es,max} & f_{sj} \geq f_{es,max} \end{cases} \quad (S16)$$

$$f_{asj} = W_{t,sj} \cdot Nt + W_{b,sj} \cdot f_{ab} + W_{c,sj} \cdot f_{ac} + W_{p,sj} \cdot f_{ap} - \theta_{sj} \quad (S17)$$

$$f_v = \frac{f_{ev,0} + f_{ev,\infty} \cdot \exp\left(\frac{f_{ab} - f_{ab,0}}{k_{ev}}\right)}{1 + \exp\left(\frac{f_{ab} - f_{ab,0}}{k_{ev}}\right)} - W_{t,v} \cdot Nt + W_{c,v} \cdot f_{ac} + W_{p,v} \cdot f_{ap} - \theta_v + \gamma_v(I) \quad (S18)$$

$$\gamma_i = \frac{\gamma_{i,min} + \gamma_{i,max} \cdot \exp\left(\frac{1-I_{0,i}}{k_{cc,i}}\right)}{1 + \exp\left(\frac{1-I_{0,i}}{k_{cc,i}}\right)} \quad (S19)$$

Where the subscript j=h, p, v indicates sympathetic activity to heart, peripheral resistances, and veins, respectively;  $f_{es,max}$ ,  $f_{es,0}$ ,  $f_{ev,0}$ ,  $f_{es,\infty}$ ,  $f_{ev,\infty}$ ,  $f_{ab,0}$ ,  $k_{es}$ , and  $k_{ev}$  are constant parameters;  $f_{sj}$  is the sympathetic activity;  $f_v$  is the frequency of spike in the efferent vagal fibers;  $f_{asj}$  is the weighted sum of  $Nt$ , the offset term caused by the CNS hypoxia ( $\theta_{sj}$ ), the afferent activities from baroreceptors ( $f_{ab}$ ), lung stretch receptors ( $f_{ap}$ ) and chemoreceptors ( $f_{ac}$ );  $W_{b,sj}$ ,  $W_{c,sj}$  and  $W_{p,sj}$  are weighting factors that relate  $f_{ab}$ ,  $f_{ac}$  and  $f_{ap}$  with  $f_{asj}$ ;  $W_{c,v}$  and  $W_{p,v}$  are weighting factors that relate  $f_{ac}$  and  $f_{ap}$  with  $f_v$ ;  $\theta_v$  is an offset term; of a characteristic sigmoid function; the subscript i=sp, sv and sh indicate sympathetic activity to peripheral arteries, veins and heart, and v denotes parasympathetic activity;  $\gamma_{i,min}$  denotes the lower saturation values of sigmoid functions;  $I_0$  and  $k_{cc}$  are constant parameters values related to the central point and the slope of characteristic sigmoid functions, respectively.

### **Effectors for Reflex Control**

$$\frac{1}{HR} = \Delta T_v + \Delta T_s + T_0 \quad (S20)$$

$$\tau_{T,v} \cdot \frac{d\Delta T_v(t)}{dt} = -\Delta T_v(t) + \sigma_{T,v}(t) \quad (S21)$$

$$\sigma_{T,v}(t) = G_{T,v} \cdot f_v(t - D_{T,v}) \quad (S22)$$

Where  $\Delta T_v$  represents the changes in heart period induced by parasympathetic stimulation;  $\Delta T_s$  represents the changes in heart period induced by sympathetic stimulation;  $\sigma_{T,v}$  is the output of characteristic function related to parasympathetic activity;  $D_{T,v}$  is a constant delay of the mechanism;  $\tau_{T,v}$  is a time constant.

### **Respiratory Mechanics**

The main elements of the equations related to the Respiratory Mechanics include compliances (C), elastances (E), pressures (P), resistances (R), volumes (V) and flows ( $\dot{V}$ ).

$$\dot{V}(t) = \frac{G_{AW}}{R_{rs}} \cdot ((P_{musc}(t) - Pao) - E_{rs} \cdot V(t)) \quad (S23)$$

Where  $R_{rs}$  is the overall resistance of the ventilatory system;  $G_{AW}$  is the airway flow gain factor;  $Pao$  is the airway pressure.

### **Respiratory Controller**

#### **Ventilation Controller**

$$\dot{V}E = \dot{V}A + BF \cdot VD \quad (S24)$$

$$VD = GV_{dead} \cdot \dot{V}A + V0_{dead} \quad (S25)$$

$$\dot{V}A = \dot{V}A_{rest} \cdot (KpCO_2 \cdot PamCO_2 + KcCO_2 \cdot PmbCO_2 + G_3 + KcMRV \cdot MRV - Kbg) \quad (S26)$$

$$G_3 = \begin{cases} KpO_2 \cdot (104 - PamO_2)^{4.9} & PamO_2 < 104 \\ 0 & PamO_2 \geq 104 \end{cases} \quad (S27)$$

Where  $\dot{V}A$  is the alveolar ventilation;  $\dot{V}A_{rest}$  is the basal value of alveolar ventilation;  $V_D$  is the dead space volume;  $P_{amO_2}$ ,  $P_{amCO_2}$  and  $P_{bmCO_2}$  are the mean values of  $PaO_2$ ,  $PaCO_2$  and  $PbCO_2$  in each respiratory cycle.

### **Breathing Pattern Optimizer**

$$\dot{W}_T = \dot{W}_I + \lambda_2 \cdot \dot{W}_E \quad (S28)$$

$$\dot{W}_I = \frac{1}{(t_1 + t_2)} \int_0^{t_1} \left[ \frac{P_{musc}(t)}{\xi_1^n \xi_2^n} + \lambda_1 \cdot \dot{V}(t)^2 \right] dt \quad (S29)$$

$$\xi_1 = 1 - P_{musc}(t)/P_{max} \quad (S30)$$

Where  $\xi_1$  and  $\xi_2$  are efficiency factors.

### ***Gas Exchange System***

#### **Gas Exchange and Mixing**

$$V_{gas} \cdot \frac{dP_{A_{gas}}}{dt} = \begin{cases} 863 \cdot (Q_{pp})(C_{v,gas} - C_{a,gas}) + \dot{V} \cdot (P_{d(5)gas} - P_{A_{gas}}) & \dot{V}(t) \geq 0 \\ 863 \cdot (Q_{pp})(C_{v,gas} - C_{a,gas}) & \dot{V}(t) < 0 \end{cases} \quad (S31)$$

$$C_{aO_2} = (C_1 \cdot Z) \cdot \frac{F_{O_2}^{1/a_1}}{1 + F_{O_2}^{1/a_1}} \quad (S32)$$

$$V_{gas} = V(t) + VL_{gas} \quad (S33)$$

Where the subscripts gas represent the specific gas ( $O_2$  or  $CO_2$ );  $V$  denotes pulmonary volume;  $Q_{pp}$  is the peripheral pulmonary blood flow;  $C_{v,gas}$  and  $C_{a,gas}$  denote venous and arterial gas concentrations, respectively;  $P_{d(5)gas}$  denotes the gas pressure in the fifth dead space compartment;  $Z$  is the molar conversion factor from mmol/l to l/l;  $F_{O_2}$  denotes the fraction of  $O_2$ ;  $a_1$  is a parameter associated with the Bohr and Haldane effects regarding the  $O_2$  dissociation in blood.

#### **Gas transport**

$$SbCO_2 \cdot \frac{dP_{vbCO_2}}{dt} = MRBCO_2 + Q_{bp} \cdot SCO_2 (PaCO_2 - P_{vbCO_2}) - h \quad (S34)$$

Where  $SbCO_2$  is the dissociation slope for  $CO_2$  in the brain tissue;  $Q_{bp}$  is Blood flow of brain peripheral compartment;  $SCO_2$  is the dissociation slope for  $CO_2$  in the blood;  $h$  is a cerebral blood flow constant.

### **REFERENCES**

- [1] C.A. Sarmiento, A.M. Hernandez, L.Y. Serna Higueta, M.Á. Mañanas, An integrated mathematical model of the cardiovascular and respiratory response to exercise: Model-building and comparison with reported models, Am. J. Physiol. Circ. Physiol. (2021) ajpheart.00074.2020. <https://doi.org/10.1152/ajpheart.00074.2020>.
